# Supplementary figures and images for: Genomic characterization of the Yersinia genus
Source: Springer Nature journal article supplement (doi:10.1186/gb-2010-11-1-r1), 2010-01-04

Parsimony Tree (with percent bootstrap support at nodes)

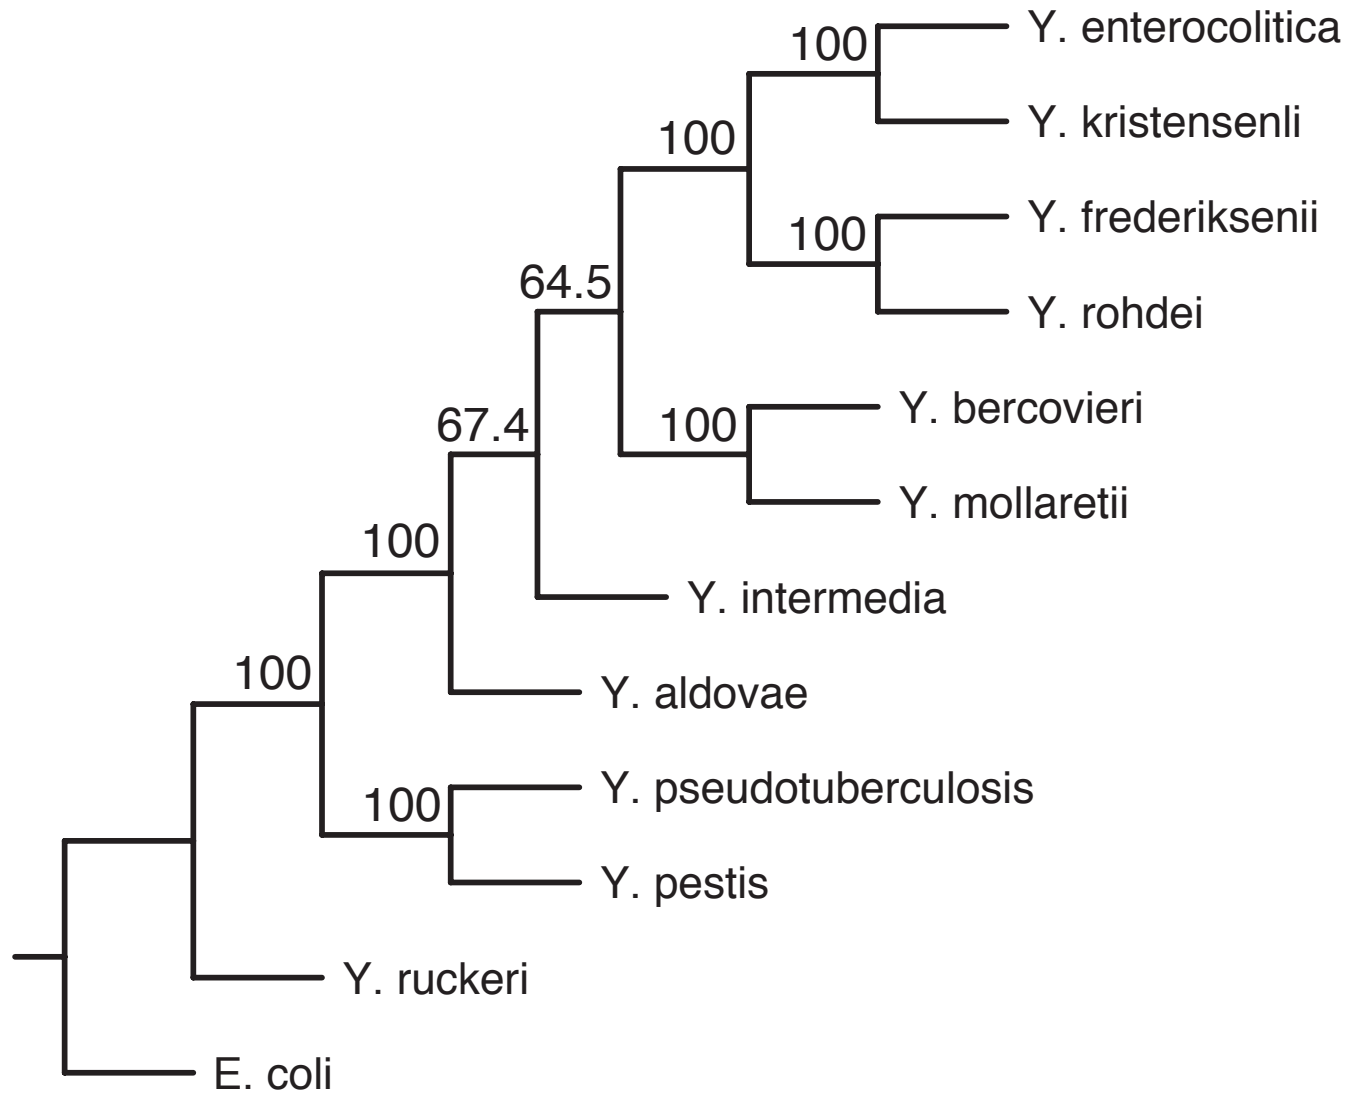

Supplement: Additional file 19 [file gb-2010-11-1-r1-s19.pdf]
